# Supplementary material
Source: PubMed Central journal article supplement (PMC8558062)
Supplement: Supp_Fig4.pdf [file Supp_Fig4.pdf]

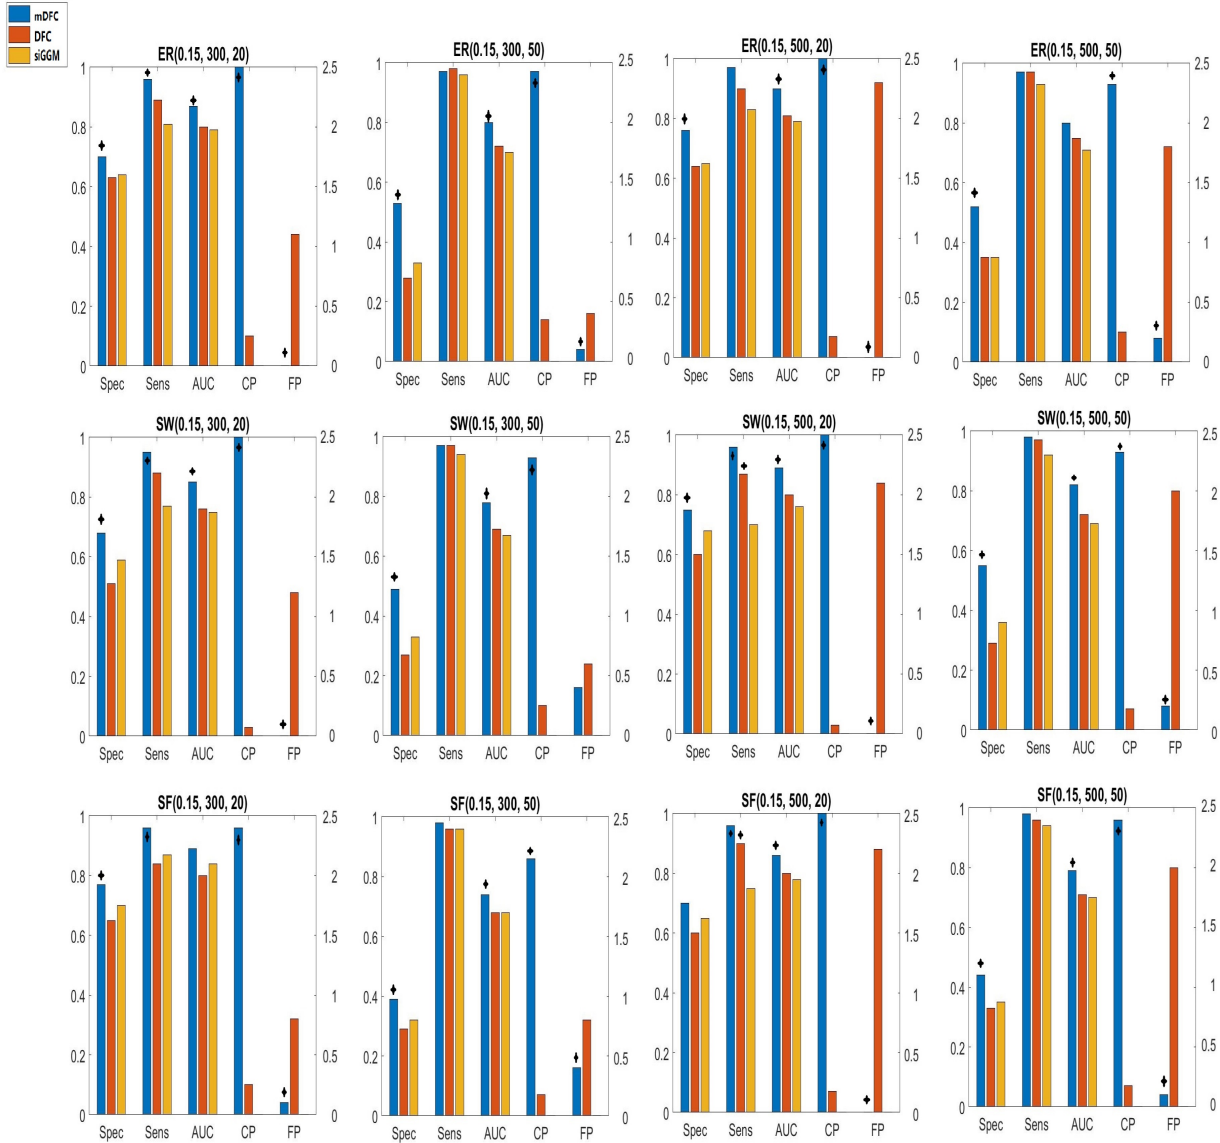

**Figure 4.** Simulation results corresponding to true dynamic networks with three transition periods instead of discrete jumps. The first column denotes different simulation scenarios: ER, SW, and SF, denote Erdos-Renyi, small world network, and scale-free networks respectively. The numbers within the parenthesis denote the network density, number of nodes, and number of time points respectively. CP is the percentage of estimated true change points. FP is the average number of false estimated change points. In terms of change points detection, mDFC performs better than DCR which is denoted as DFC in this Figure. mDFC also has higher AUC compared with siGGM and DCR.
