# Supplementary material
Source: PubMed Central journal article supplement (PMC8558062)
Supplement: Supp_Fig5.pdf [file Supp_Fig5.pdf]

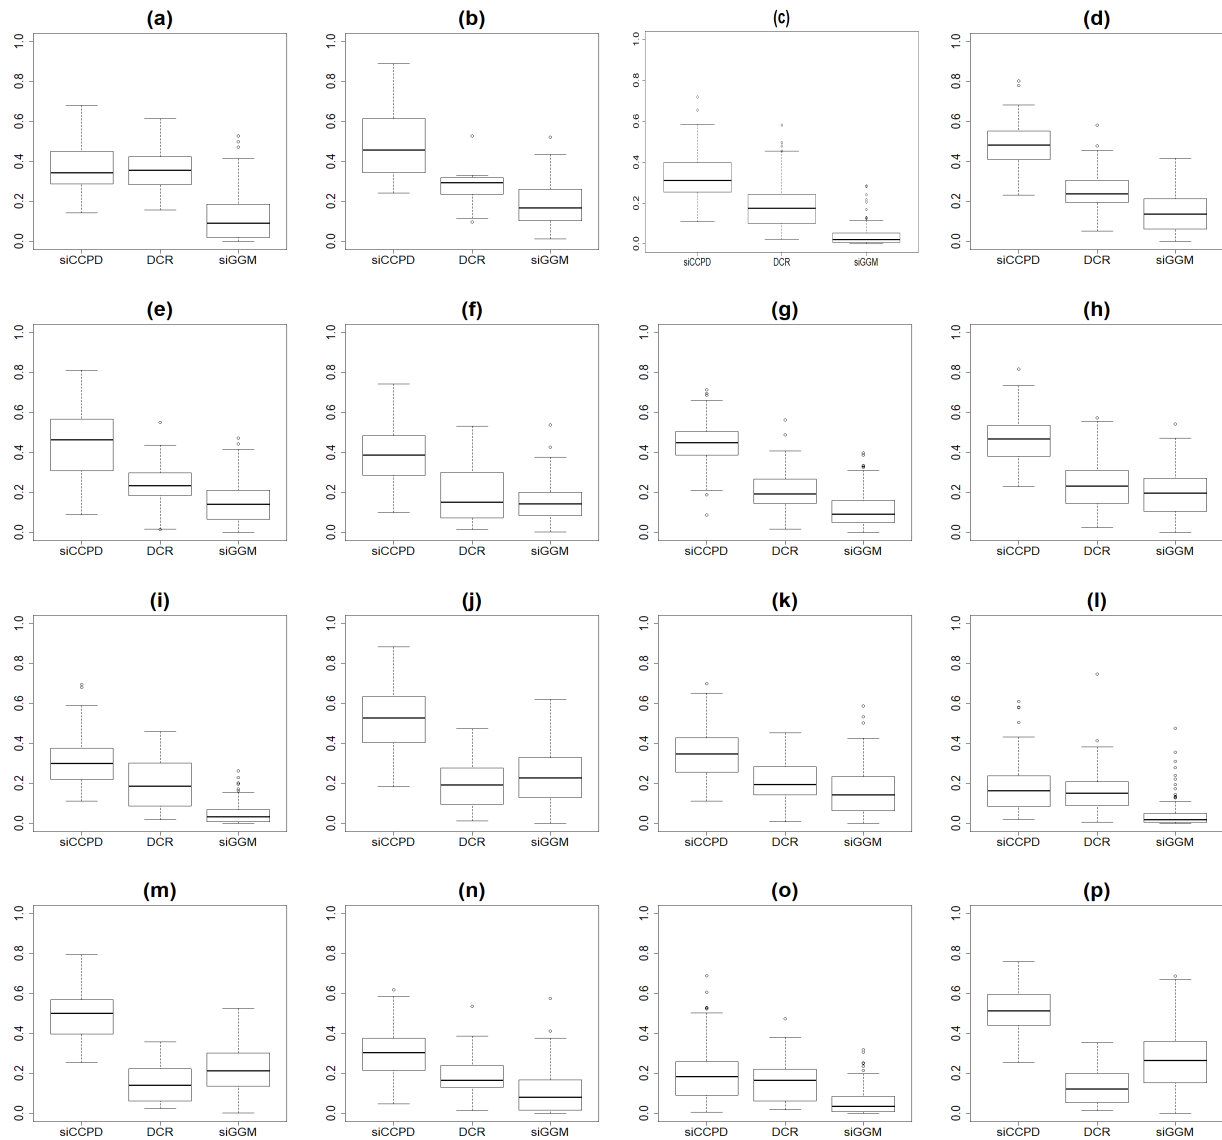

**Figure 5.**  $R^2$  when using scalar on function regression for resilience score for mDFC, SC naive DFC, and siGGM. The subplots indicate  $R^2$  values when using the following explanatory variables in scalar-on-function regression (a): Clustering coefficient (b): global efficiency, and local clustering coefficient for salience network(c), subcortical regions(d), Ventral-attention(e), Dorsal-attention network(f). Panels (g)-(j) used the local clustering coefficient for the combined modules VIS and SAL (g), VIS and subcortical (h), VIS and VAN (i), and VIS and DAN (j). Local Efficiency of subcortical(k), VAN(l) and DAN(m) are also used. Results for local efficiency for the combined modules VIS and subcortical (n), VIS and VAN (o), and VIS and DAN (p) are provided in panels (n)-(p). The proposed mDFC has significantly higher  $R^2$  in almost all cases.
