# Supplementary material
Source: PubMed Central journal article supplement (PMC8558062)
Supplement: Supp_Fig8-9.pdf [file Supp_Fig8-9.pdf]

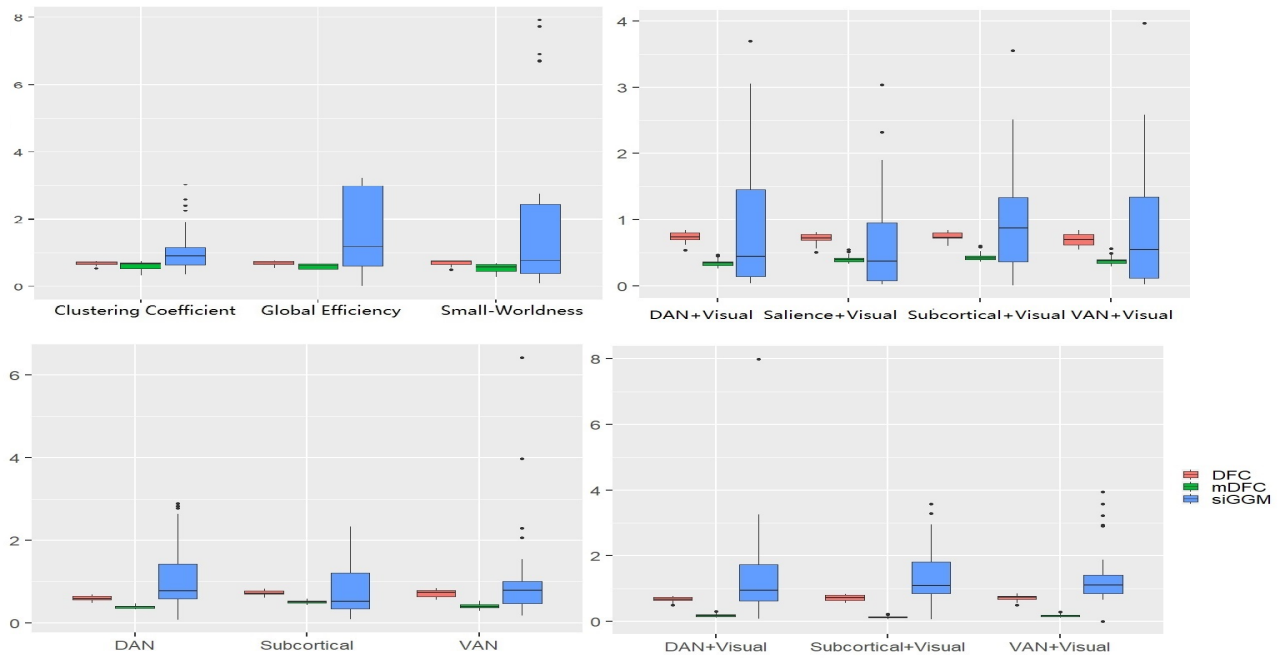

**Figure 8.** Prediction box plots for BDI unadjusted analysis with network density = 0.05

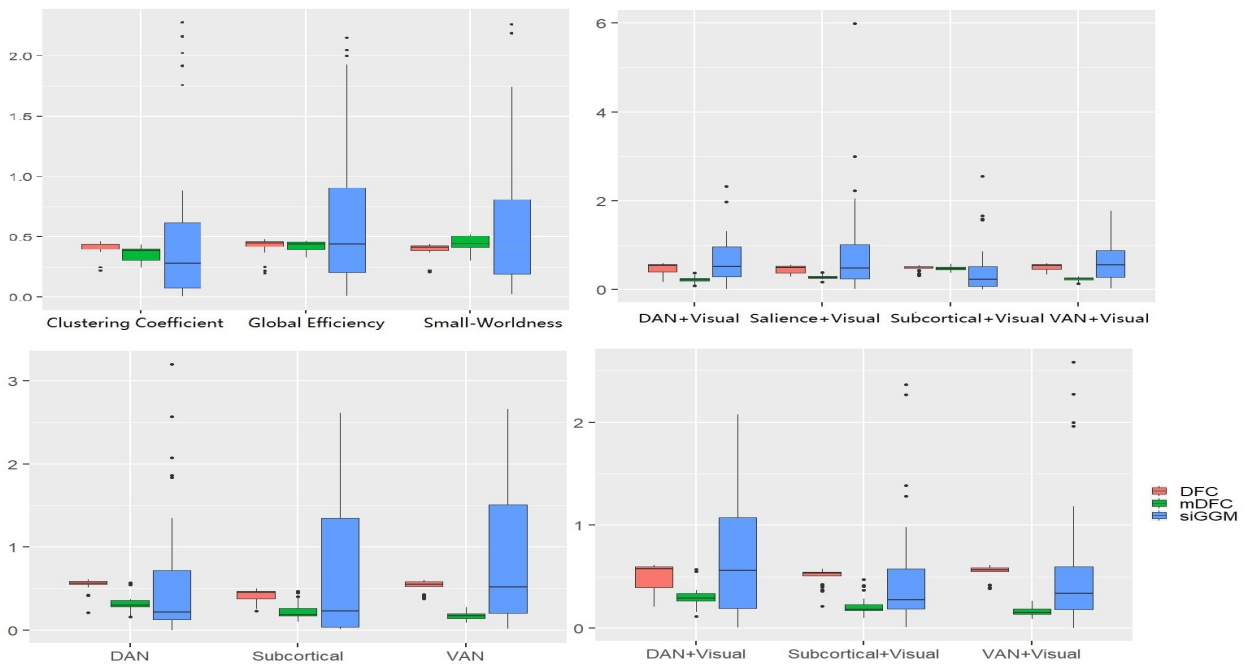

**Figure 9.** Prediction box plots for BDI adjusted analysis with network density = 0.15
