# Supplementary material
Source: PubMed Central journal article supplement (PMC8558062)
Supplement: Supp_Fig10-11.pdf [file Supp_Fig10-11.pdf]

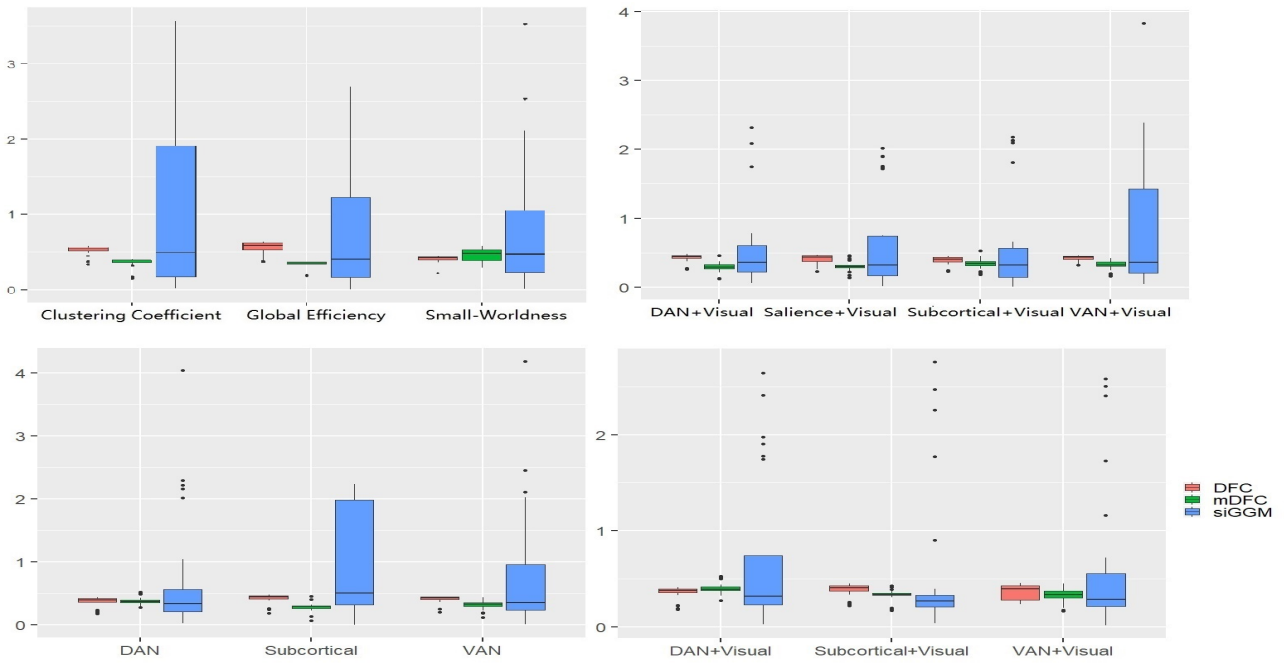

**Figure 10.** Prediction box plots for BDI adjusted analysis with network density = 0.10

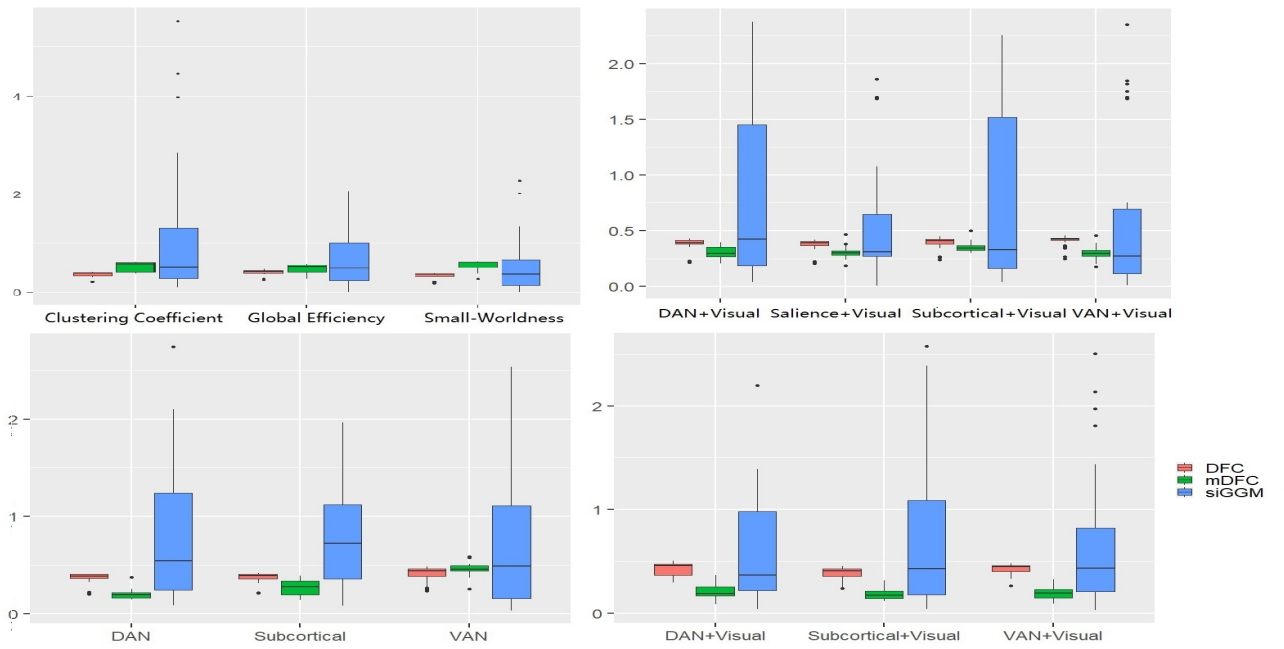

**Figure 11.** Prediction box plots for BDI adjusted analysis with network density = 0.05
