# Supplementary material
Source: PubMed Central journal article supplement (PMC8558062)
Supplement: Supp_Table1.pdf [file Supp_Table1.pdf]

| Network Density=0.15              | BDI unadjusted |               |              | BDI adjusted |               |              |
|-----------------------------------|----------------|---------------|--------------|--------------|---------------|--------------|
|                                   | mDFC vs DFC    | mDFC vs siGGM | DFC vs siGGM | mDFC vs DFC  | mDFC vs siGGM | DFC vs siGGM |
| Global Efficiency (GE)            | < 0.0001       | 0.0003        | 0.0112       | 0.1603       | 0.0063        | 0.0087       |
| Clustering Coefficient (CC)       | < 0.0001       | < 0.0001      | 0.002        | 0.6287       | 0.0342        | 0.0303       |
| Local CC for Visual+Salience      | < 0.0001       | 0.0084        | 0.0303       | < 0.0001     | 0.0057        | 0.0238       |
| Local CC for Visual+Subcortical   | < 0.0001       | < 0.0001      | 0.0942       | 0.8142       | 0.125         | 0.1313       |
| Local CC for Visual+VAN           | < 0.0001       | < 0.0001      | 0.0272       | < 0.0001     | < 0.0001      | 0.0659       |
| Local CC for Visual+DAN           | < 0.0001       | < 0.0001      | 0.0056       | < 0.0001     | 0.0018        | 0.9271       |
| Local efficiency (LE) subcortical | < 0.0001       | 0.0012        | 0.7129       | < 0.0001     | 0.0001        | 0.0096       |
| LE for VAN                        | < 0.0001       | < 0.0001      | 0.0569       | < 0.0001     | 0.0002        | 0.0517       |
| LE for DAN                        | < 0.0001       | < 0.0001      | 0.7499       | < 0.0001     | 0.8618        | 0.0351       |
| LE for Visual+Subcortical         | < 0.0001       | < 0.0001      | 0.6393       | < 0.0001     | 0.0002        | 0.0897       |
| LE for Visual+VAN                 | < 0.0001       | < 0.0001      | 0.0131       | < 0.0001     | 0.0006        | 0.1064       |
| LE for Visual+DAN                 | < 0.0001       | < 0.0001      | 0.2579       | < 0.0001     | 0.0075        | 0.1727       |
| Network Density=0.10              | BDI unadjusted |               |              | BDI adjusted |               |              |
|                                   | mDFC vs DFC    | mDFC vs siGGM | DFC vs siGGM | mDFC vs DFC  | mDFC vs siGGM | DFC vs siGGM |
| Global Efficiency(GE)             | < 0.0001       | 0.0557        | 0.0141       | < 0.0001     | 0.0223        | 0.0022       |
| Clustering Coefficient(CC)        | < 0.0001       | 0.0443        | 0.0442       | < 0.0001     | 0.691         | 0.0352       |
| Local CC for Visual+Salience      | < 0.0001       | < 0.0001      | 0.0001       | < 0.0001     | 0.0014        | 0.3601       |
| Local CC for Visual+Subcortical   | < 0.0001       | < 0.0001      | 0.0119       | < 0.0001     | 0.0001        | 0.0098       |
| Local CC for Visual+VAN           | < 0.0001       | < 0.0001      | 0.0026       | < 0.0001     | 0.0001        | 0.0529       |
| Local CC for Visual+DAN           | < 0.0001       | < 0.0001      | 0.0009       | < 0.0001     | 0.0001        | 0.1005       |
| Local efficiency(LE) Subcortical  | < 0.0001       | 0.0012        | 0.0023       | < 0.0001     | 0.0003        | 0.0181       |
| LE for VAN                        | < 0.0001       | < 0.0001      | 0.0334       | < 0.0001     | 0.0008        | 0.002        |
| LE for DAN                        | < 0.0001       | 0.0053        | 0.1102       | < 0.0001     | 0.0006        | 0.0089       |
| LE for Visual+Subcortical         | < 0.0001       | 0.0023        | 0.5188       | < 0.0001     | 0.0018        | 0.2093       |
| LE for Visual+VAN                 | < 0.0001       | 0.002         | 0.4319       | < 0.0001     | 0.0025        | 0.0348       |
| LE for Visual+DAN                 | < 0.0001       | 0.0003        | 0.0726       | < 0.0001     | 0.0009        | 0.0346       |
| Network Density=0.05              | BDI unadjusted |               |              | BDI adjusted |               |              |
|                                   | mDFC vs DFC    | mDFC vs siGGM | DFC vs siGGM | mDFC vs DFC  | mDFC vs siGGM | DFC vs siGGM |
| Global Efficiency(GE)             | 0.0136         | 0.0252        | 0.0198       | < 0.0001     | 0.0056        | 0.0016       |
| Clustering Coefficient(CC)        | 0.0052         | 0.1149        | 0.1156       | < 0.0001     | 0.3085        | 0.3039       |
| Local CC for Visual+Salience      | < 0.0001       | 0.0248        | 0.9396       | 0.0014       | 0.0116        | 0.0329       |
| Local CC for Visual+Subcortical   | < 0.0001       | 0.0154        | 0.753        | 0.0039       | 0.0518        | 0.1149       |
| Local CC for Visual+VAN           | < 0.0001       | 0.0017        | 0.1556       | < 0.0001     | 0.0007        | 0.0045       |
| Local CC for Visual+DAN           | < 0.0001       | 0.017         | 0.5001       | < 0.0001     | 0.0827        | 0.2382       |
| Local efficiency(LE) subcortical  | < 0.0001       | 0.0016        | 0.1679       | < 0.0001     | 0.0003        | 0.0031       |
| LE for VAN                        | < 0.0001       | < 0.0001      | 0.0008       | 0.4029       | 0.0931        | 0.0733       |
| LE for DAN                        | < 0.0001       | 0.001         | 0.0516       | < 0.0001     | 0.0001        | 0.0011       |
| LE for Visual+Subcortical         | < 0.0001       | < 0.0001      | 0.0015       | < 0.0001     | 0.0004        | 0.0464       |
| LE for Visual+VAN                 | < 0.0001       | 0.0003        | 0.3401       | < 0.0001     | 0.0002        | 0.0149       |
| LE for Visual+DAN                 | < 0.0001       | < 0.0001      | 0.001        | < 0.0001     | < 0.0001      | 0.0024       |

**Table 1.** Reported p-values for testing significant differences in predictive accuracy under the proposed mDFC approach and alternative approaches without adjusting for BDI (columns 2-4) and incorporating BDI (columns 5-7), under the scalar-on-function regression with dynamic network density=0.15, 0.10, and 0.05. The proposed mDFC approach results in dynamic networks that leads to significant improvements in predictive accuracy for both BDI adjusted and unadjusted analyses.
